# Supplementary material for: Rational Analysis of Drag Reduction Variation Induced by Surface Microstructures Inspired by the Middle Section of Barchan Dunes at High Flow Velocity
Source: MDPI journal article supplement (doi:10.3390/coatings12050563), 2022-04-21
Supplement: s1 [file s1]

## Supplementary Files

# Rational Analysis of Drag Reduction Variation Induced by Surface Microstructures Inspired by the Middle Section of Barchan Dunes at High Flow Velocity

Jiawei Jiang <sup>1</sup>, Yizhou Shen <sup>1,\*</sup>, Yangjiangshan Xu <sup>1</sup>, Zhen Wang <sup>1</sup>, Senyun Liu <sup>2</sup>, Weilan Liu <sup>3</sup> and Jie Tao <sup>1,\*</sup>

<sup>1</sup> College of Materials Science and Technology, Nanjing University of Aeronautics and Astronautics, Nanjing 210016, China; jiangjiawei@nuaa.edu.cn (J.J.); xyjshan@nuaa.edu.cn (Y.X.); wangzhen94@nuaa.edu.cn (Z.W.)

<sup>2</sup> Key Laboratory of Icing and Anti/De-Icing, China Aerodynamics Research and Development Center, Mianyang 621000, China; liusenyuan@cardc.cn

<sup>3</sup> Institute of Advanced Materials, Nanjing Tech University, Nanjing 210009, China; iamwlliu@njtech.edu.cn

\* Correspondence: shenyizhou@nuaa.edu.cn (Y.S.); taojie@nuaa.edu.cn (J.T.)

## 1. Numerical Simulation Model

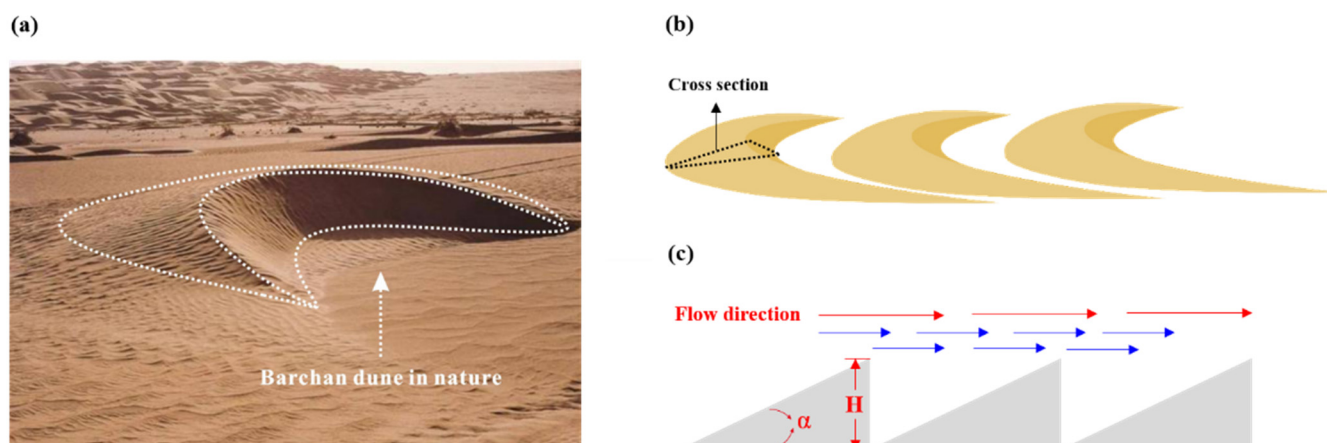

**Figure S1.** Illustrations of simulation model. (a) Barchan dune topography in nature, (b) typical model and cross-section parameters of a structural unit, (c) typical cross-section of the model.

## 2. Calculation Mathematical Model

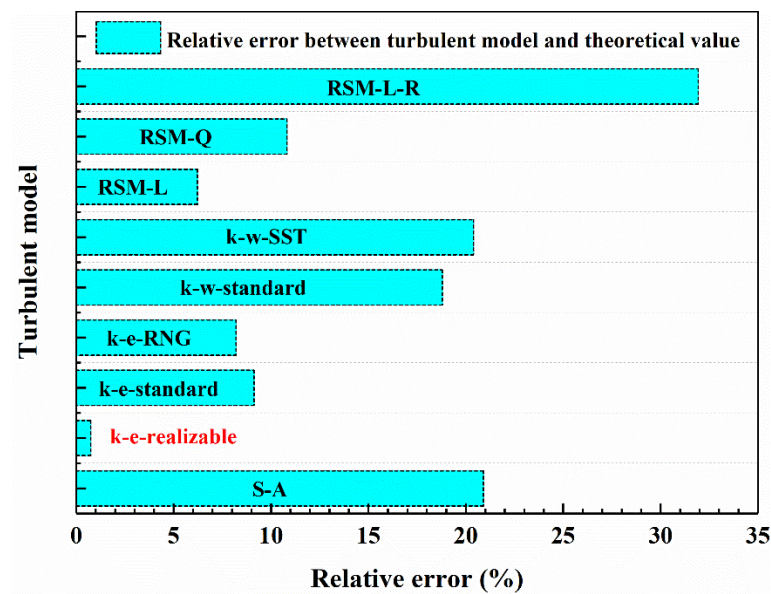

**Figure S2.** The comparison between the theoretical values and the calculated values under different turbulence models.

### 3. Calculation Mathematical Model

The realizable  $k$ - $\varepsilon$  model:

$$\frac{\partial}{\partial t}(\rho k) + \frac{\partial}{\partial x_i}(\rho k u_i) = \frac{\partial}{\partial x_i} \left[ \left( \mu + \frac{\mu_t}{\sigma_k} \right) \frac{\partial k}{\partial x_i} \right] + G_k + G_b - \rho \varepsilon - Y_M + S_k \quad (\text{S1})$$

$$\frac{\partial}{\partial t}(\rho \varepsilon) + \frac{\partial}{\partial x_j}(\rho \varepsilon u_j) = \frac{\partial}{\partial x_j} \left[ \left( \mu + \frac{\mu_t}{\sigma_\varepsilon} \right) \frac{\partial \varepsilon}{\partial x_j} \right] + \rho C_1 S \varepsilon - \rho C_2 \frac{\varepsilon^2}{k + \sqrt{\nu \varepsilon}} + C_{1\varepsilon} \frac{\varepsilon}{k} C_{3\varepsilon} G_b + S_\varepsilon \quad (\text{S2})$$

Where

$$C_1 = \max \left[ 0.43, \frac{\eta}{\eta + 5} \right] \quad (\text{S3})$$

$$\eta = S \frac{k}{\varepsilon} \quad (\text{S4})$$

$$G_k = \mu_t S^2 \quad (\text{S5})$$

$$S = \sqrt{2 S_{ij} S_{ij}} \quad (\text{S6})$$

$$S_{ij} = \frac{1}{2} \left( \frac{\partial u_j}{\partial x_i} + \frac{\partial u_i}{\partial x_j} \right) \quad (\text{S7})$$

$$G_b = -g_i \frac{\mu_t}{\rho Pr_t} \frac{\partial \rho}{\partial x_i} \quad (\text{S8})$$

For ideal gas, the turbulent viscosity coefficient is expressed as follows

$$\mu_t = \rho C \mu \frac{k^2}{\varepsilon} \quad (\text{S9})$$

The LES model:

$$\frac{\partial \rho}{\partial t} + \frac{\partial}{\partial x_i}(\rho \bar{u}_i) = 0 \quad (\text{S10})$$

$$\frac{\partial}{\partial t}(\rho \bar{u}_i) + \frac{\partial}{\partial x_j}(\rho \bar{u}_i \bar{u}_j) = \frac{\partial}{\partial x_j}(\mu \frac{\partial \bar{u}_i}{\partial x_j}) - \frac{\partial \bar{p}}{\partial x_i} - \frac{\partial \tau_{ij}}{\partial x_j} \quad (S11)$$

Therein, the subgrid tension ( $\tau_{ij}$ ) is defined as:

$$\tau_{ij} = \rho \bar{u}_i \bar{u}_j - \rho \bar{u}_i \bar{u}_j \quad (S12)$$

The enhanced wall treatment, which was suitable for complex flow in a high-Reynolds-number turbulence model, was used for the near-wall treatment. More specific parameters of above equations can be referred to previous studies [29,31].

#### 4. The Independence of the Computational Grid

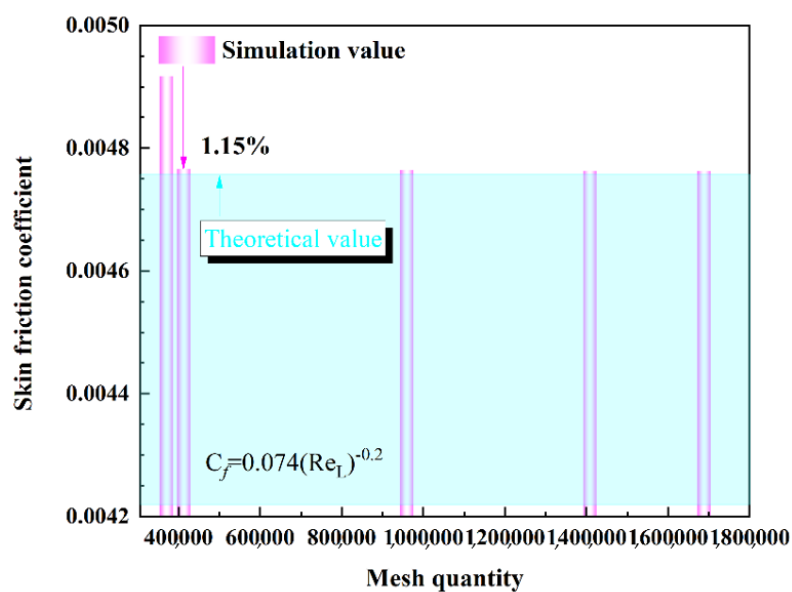

Figure S3. Validation of the grid independence.
