# Supplementary material for: Rational Analysis of Drag Reduction Variation Induced by Surface Microstructures Inspired by the Middle Section of Barchan Dunes at High Flow Velocity
Source: MDPI journal article supplement (doi:10.3390/coatings12050563), 2022-04-21
Supplement: s1 [file s1]

Archive with 1 entries (1 files):
- coatings-1644179-supplementary.pdf
